# Supplementary material
Source: publisher site journal article supplement (https://www.kjim.org/upload/media/kjim-2021-442-suppl3.pdf)
Supplement: Supplementary file 1 [file kjim-2021-442-suppl3.pdf]

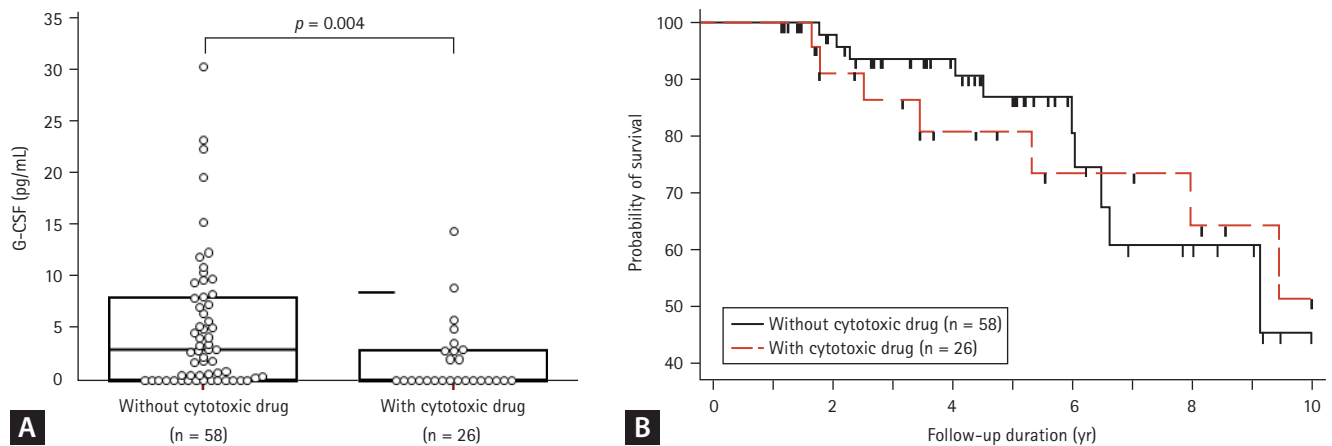

**Supplementary Figure 2.** Comparison of granulocyte colony-stimulating factor (G-CSF) levels and survival probability in patients with idiopathic pulmonary fibrosis (IPF) according to use of the cytotoxic drug azathioprine. (A) The G-CSF protein was detected in 43 of 58 IPF patients who did not receive azathioprine, and in 10 of 26 IPF patients who received it. (B) Survival during the 10-year follow-up was not different between the azathioprine-treated and untreated subjects (45.8% vs. 51.6%,  $p = 0.899$ ).
